# Supplementary material
Source: PubMed Central journal article supplement (PMC3046233)

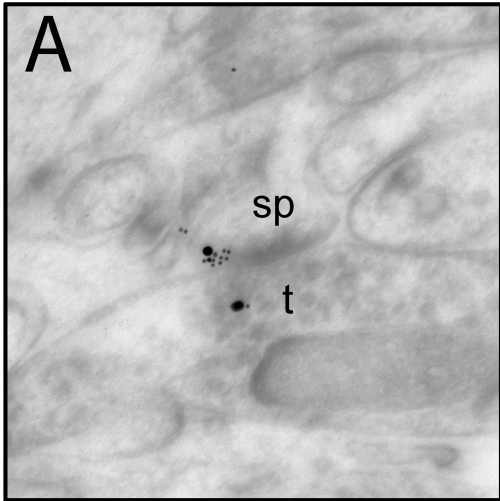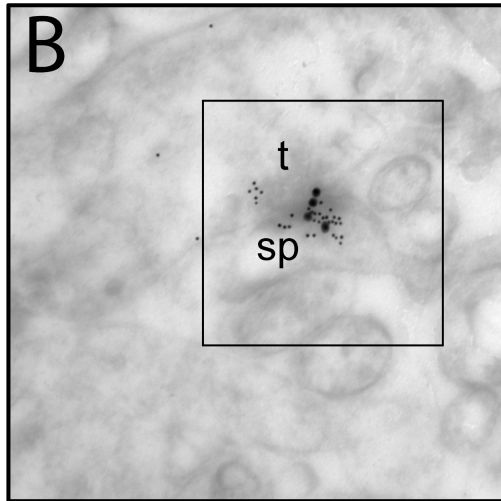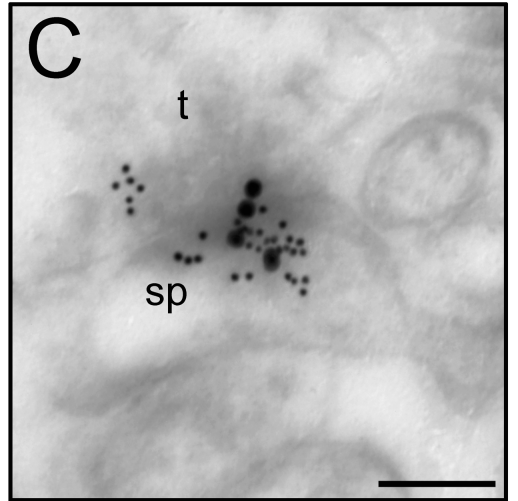

Supplement: NIHMS256725-supplement-02.pdf [file NIHMS256725-supplement-02.pdf]
